# Supplementary material for: The formation of core cross-linked star polymer and nanogel assemblies facilitated by the formation of dynamic covalent imine bonds
Source: Royal Society of Chemistry journal article supplement (doi:10.1039/c1py00261a), 2011-01-01
Supplement: c1py00261a.pdf [file c1py00261a.pdf]

# The formation of core cross-linked star polymer and nanogel assemblies facilitated by the formation of dynamic covalent imine bonds

Alexander W. Jackson, Christopher Stakes and David A. Fulton\*

## Supporting Information

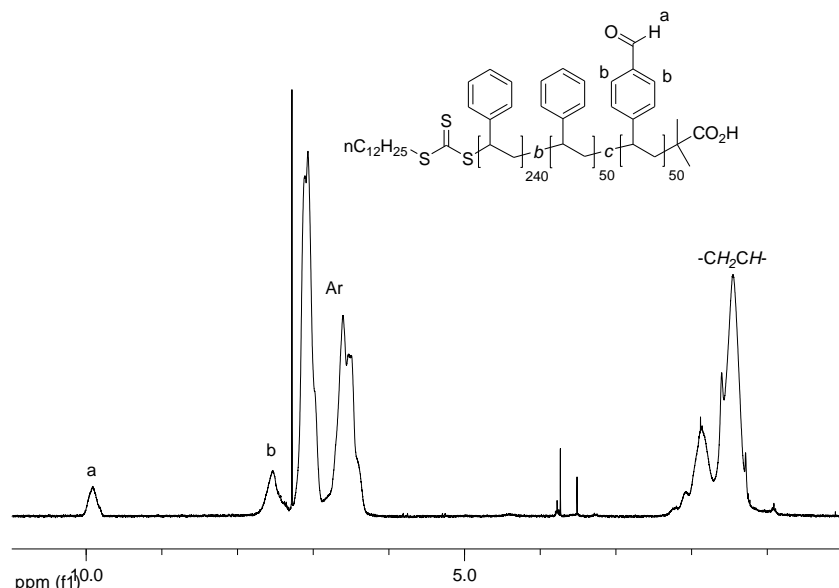

S1. <sup>1</sup>H NMR spectrum (CDCl<sub>3</sub>) of aldehyde functional diblock copolymer **P3**.

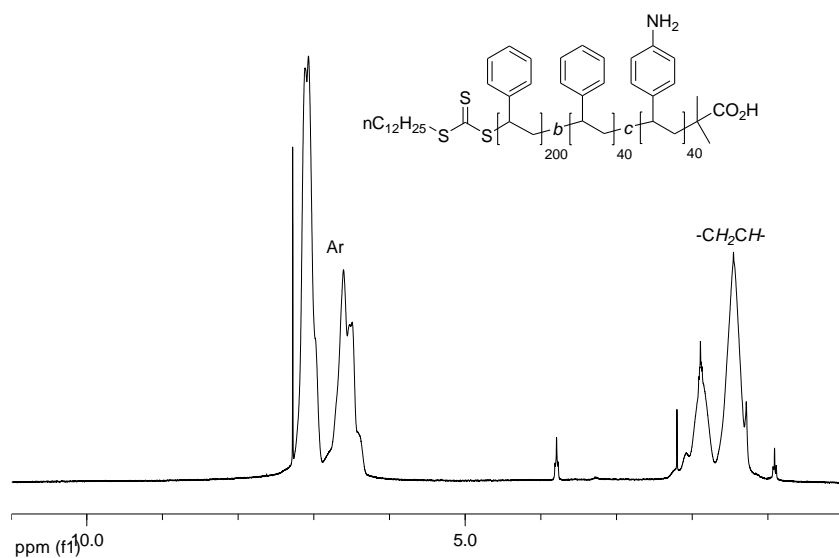

S2. <sup>1</sup>H NMR spectrum (CDCl<sub>3</sub>) of amine functional diblock copolymer **P4**.

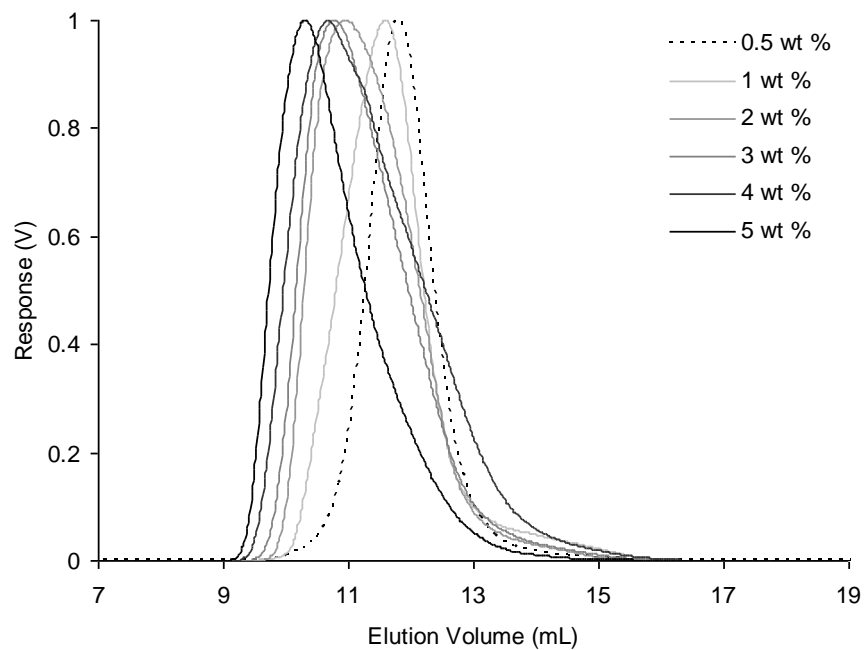

S3. Gel permeation chromatography (GPC) multi-angle laser light scattering (MALLS) traces (THF, 1.0 mL/min) of styrenic CCS polymers at 0.5 - 5 wt %.

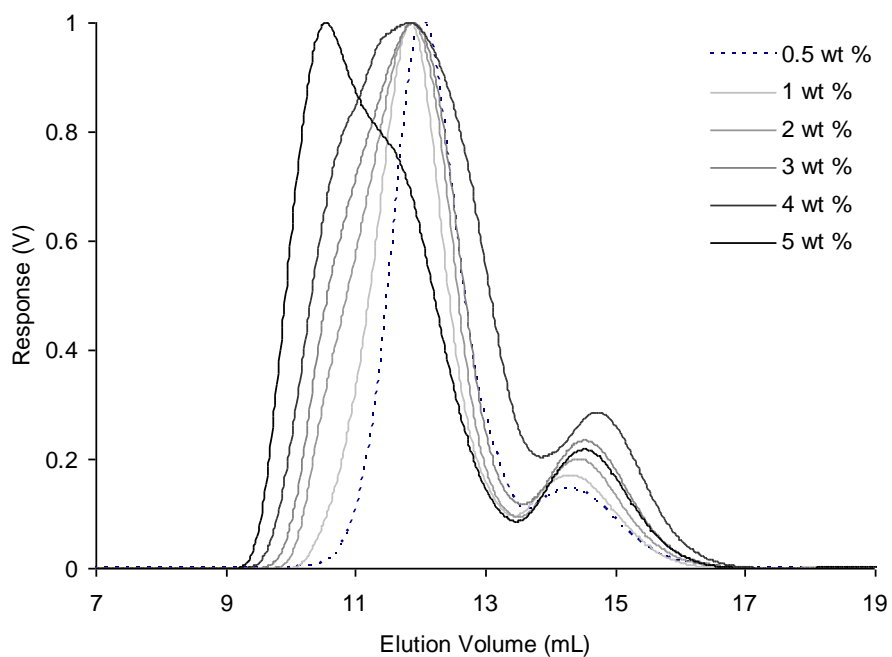

S4. Gel permeation chromatography (GPC) differential refractive index (dRI) traces (THF, 1.0 mL/min) of styrenic CCS polymers at 0.5 - 5 wt %.

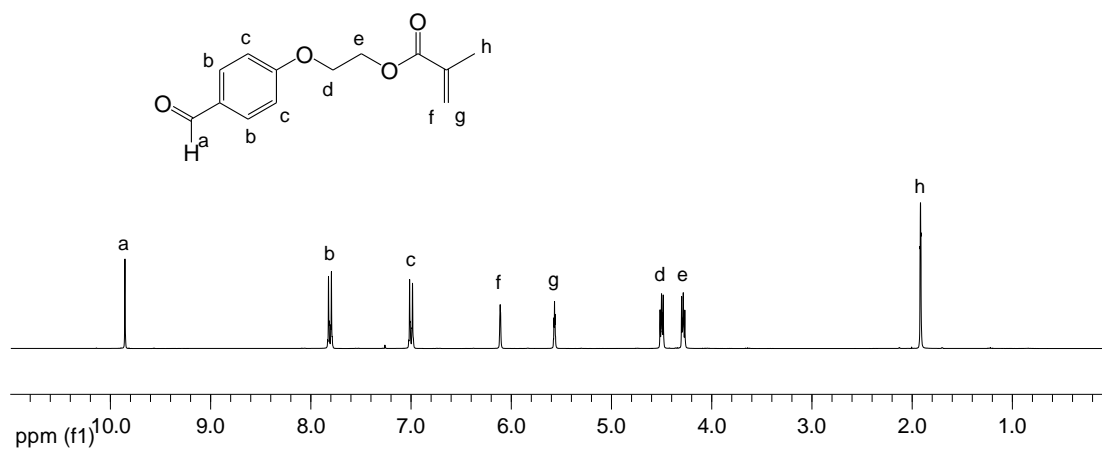

S5. <sup>1</sup>H NMR (CDCl<sub>3</sub>) spectra of *p*-(2-methacryloxyethoxy)benzaldehyde (**M1**).

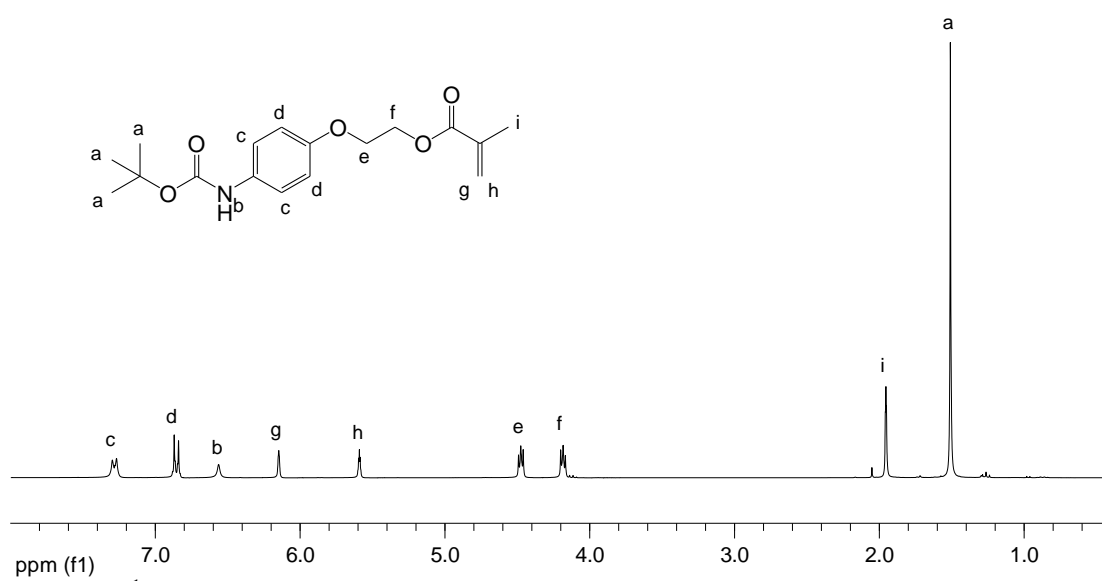

S6. <sup>1</sup>H NMR (CDCl<sub>3</sub>) spectra of *p*-(2-Methacryloxyethoxy)-*N*-boc-aminobenzene (**M2**).

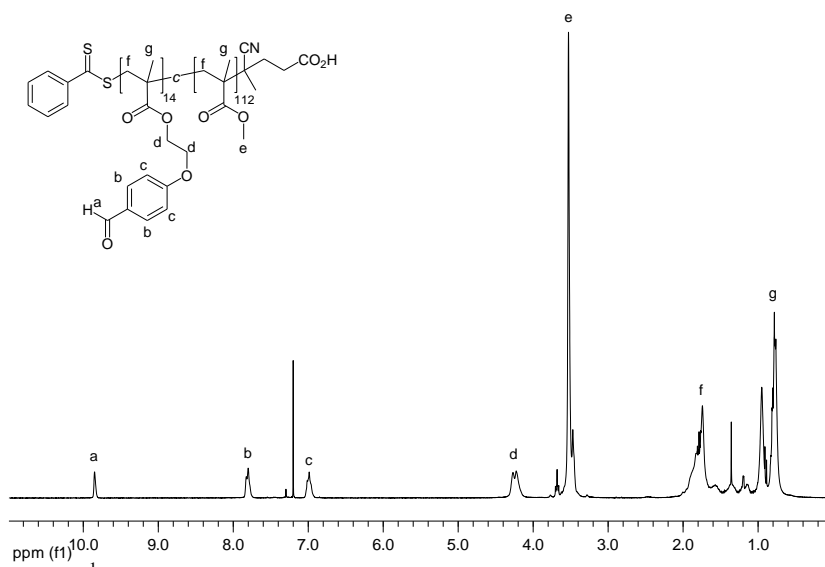

S7. <sup>1</sup>H NMR spectrum (CDCl<sub>3</sub>) of aldehyde functional copolymer **P5**.

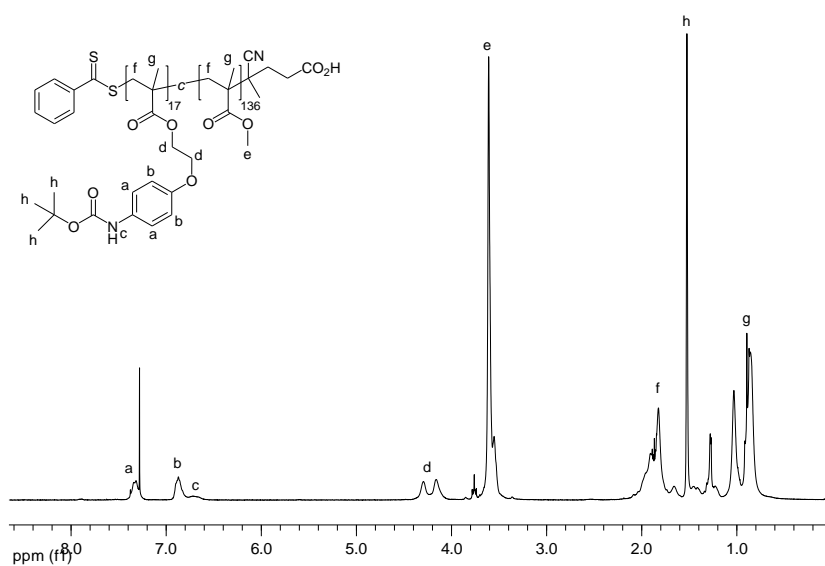

S8. <sup>1</sup>H NMR spectrum (CDCl<sub>3</sub>) of *N*-boc-amine functional copolymer **P6**.

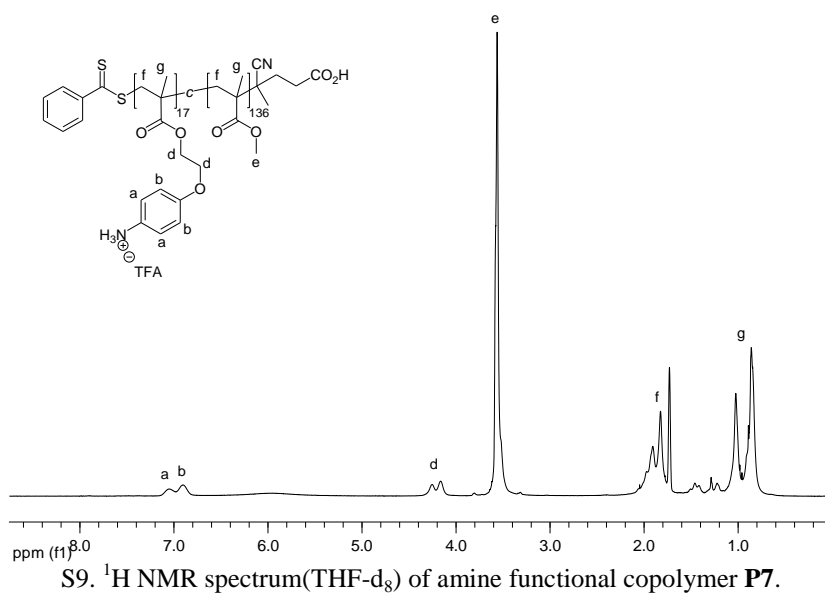

S9. <sup>1</sup>H NMR spectrum (THF-d<sub>8</sub>) of amine functional copolymer **P7**.

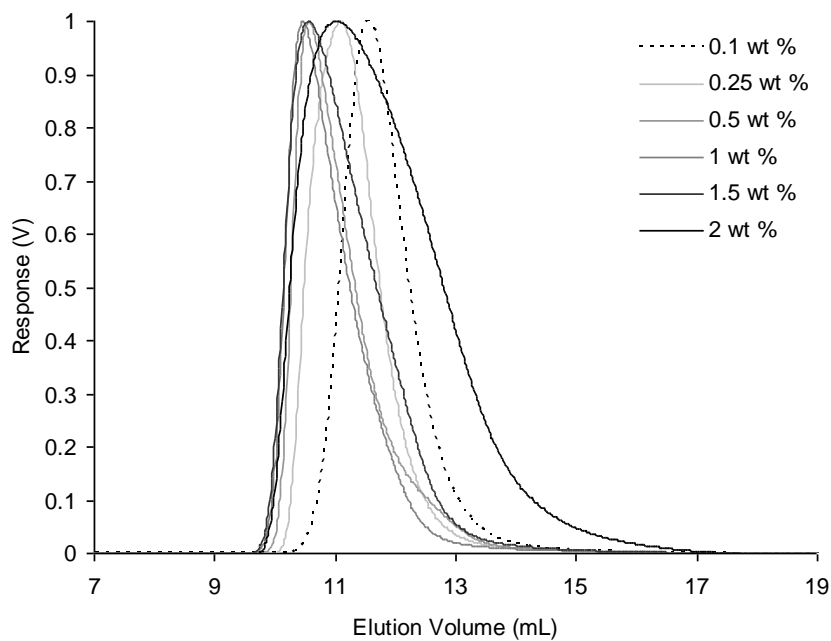

S10. Gel permeation chromatography (GPC) multi-angle laser light scattering (MALLS) traces (THF, 1.0 mL/min) of methyl methacrylate nanogels at 0.1 - 2 wt %.

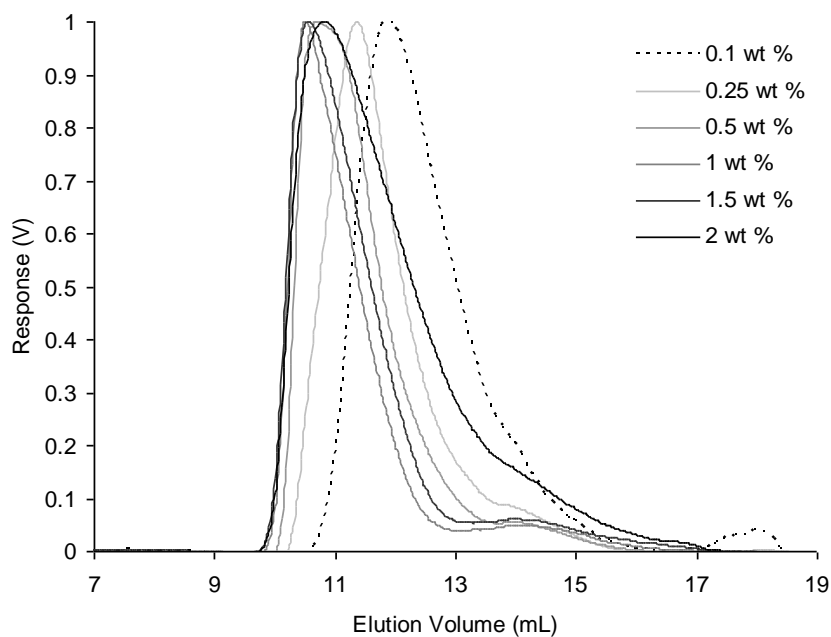

S11. Gel permeation chromatography (GPC) differential refractive index (dRI) traces (THF, 1.0 mL/min) of methyl methacrylate nanogels at 0.1 - 2 wt %.

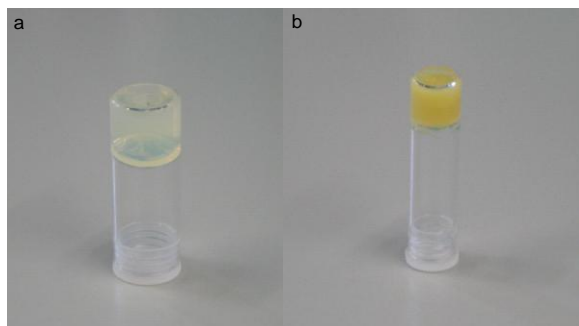

S12. a) Gelation of **P1** and **P2b** in THF (0.5 wt %), b) Gelation of **P1** and **P2b** in THF (5 wt %).

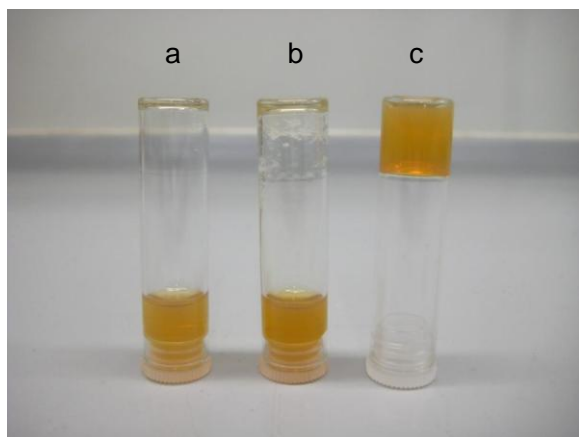

S13. a) Cross-linking of **P5** and **P7** in THF (3 wt %), b) Cross-linking of **P5** and **P7** in THF (4 wt %),  
c) Gelation of **P5** and **P7** in THF (5 wt %)
